# Supplementary material for: Tunability of Superconducting Split-Ring Resonators With dc And rf Magnetic Fields
Source: MDPI journal article supplement (doi:10.3390/jof7070565), 2007-03-07
Supplement: s1 [file s1]

**Table S1.** Ash leaflets, seed and roots collected for fungal isolations, DNA extraction and HTS. Leaves and seed collected from Roosky, Co. Roscommon; leaves only collected from Glasnevin Botanic Garden, Co. Dublin and Lake Annecy France. Roots collected from Kinsealy, Co. Dublin genebank only.

| No.           | Code or name              | Additional info |
|---------------|---------------------------|-----------------|
| Roosky leaves | <i>Fraxinus excelsior</i> | Plot number     |
| 1             | A                         | 13              |
| 2             | A1.a                      | 5               |
| 3             | A1.b                      | 5               |
| 4             | A1.c                      | 5               |
| 5             | B                         | 20              |
| 6             | C                         | 7               |
| 7             | D1.a                      | 12              |
| 8             | D1.b                      | 12              |
| 9             | D1.c                      | 12              |
| 10            | E                         | 9               |
| 11            | E1.a                      | 11              |
| 12            | E1.b                      | 11              |
| 13            | F1.a                      | 21              |
| 14            | F1.b                      | 21              |
| 15            | G.a                       | 24              |
| 16            | G.b                       | 24              |
| 17            | G1.a                      | 30              |
| 18            | G1.b                      | 30              |
| 19            | H                         | 25              |
| 20            | H1.a                      | 1               |
| 21            | H1.b                      | 1               |
| 22            | J                         | 29              |
| 23            | J1                        | 18              |
| 24            | K                         | 2               |
| 25            | K1.b                      | 10              |
| 26            | L                         | 14              |
| 27            | L1                        | 33              |
| 28            | M                         | 31              |
| 29            | M1                        | 15              |
| 30            | O1                        | 27              |
| 31            | Q1                        | 37              |
| 32            | R1.a                      | 28              |
| 33            | R1.b                      | 28              |
| 34            | S1.a                      | 19              |
| 35            | S1.b                      | 19              |
| 36            | T1.a                      | 32              |
| 37            | T1.b                      | 32              |
| 38            | T1.c                      | 32              |
| 39            | U1                        | 36              |
| 40            | Y                         | 23              |

  

| Roosky seed | <i>Fraxinus excelsior</i> | Plot number |
|-------------|---------------------------|-------------|
| 1           | A                         | 7           |
| 2           | B                         | 13          |
| 3           | B                         | 15          |

|    |           |    |
|----|-----------|----|
| 4  | B         | 17 |
| 5  | B (Irish) | 16 |
| 6  | C         | 12 |
| 7  | D         | 4  |
| 8  | D1        | 9  |
| 9  | E1        | 3  |
| 10 | G         | 2  |
| 11 | G1.b      | 14 |
| 12 | H         | 10 |
| 13 | K         | 8  |
| 14 | Q         | 11 |
| 15 | U         | 5  |
| 16 | U1        | 1  |
| 17 | Z         | 6  |

| Glasnevin leaf | Taxon                           | Accession   |
|----------------|---------------------------------|-------------|
| 1              | <i>Fraxinus texensis</i>        | 011046      |
| 2              | <i>Fraxinus xanthoxyloides</i>  | 2003.0735   |
| 3              | <i>Fraxinus glabra</i>          | 1909.011054 |
| 4              | <i>Fraxinus mandshurica</i>     | 1934.011053 |
| 5              | <i>Fraxinus potamophila</i>     | 1932.011031 |
| 6              | <i>Fraxinus americana</i>       | 2001.1739   |
| 7              | <i>Fraxinus pubinervis</i>      | 1954.011044 |
| 8              | <i>Fraxinus angustifolia</i>    | 011028      |
| 9              | <i>Fraxinus excelsior</i>       | 2000.3637A  |
| 10             | <i>Fraxinus ornus</i>           | 1977.0039   |
| 11             | <i>Fraxinus ornus</i>           | 2005.0652   |
| 12             | <i>Fraxinus excelsior</i> ('Di- | 011040      |
| 13             | <i>Fraxinus dipetala</i>        | 011038      |
| 14             | <i>Fraxinus excelsior</i> (or-  | 011029      |
| 15             | <i>Fraxinus</i> sp..            | 2013.0214   |
| 16             | <i>Fraxinus ornus</i>           | 1969.011033 |
| 17             | <i>Fraxinus ornus</i>           | 011034      |
| 18             | <i>Fraxinus numidica</i>        | 1904.011032 |
| 19             | <i>Fraxinus angustifolia</i>    | 011074      |
| 20             | <i>Fraxinus</i> sp.             | 2006.1641   |
| 21             | <i>Fraxinus</i> sp. (greybud)   | s.n.        |
| 22             | <i>Fraxinus excelsior</i> 'Pen- | 011048      |
| 23             | <i>Fraxinus pennsylvanica</i>   | 1889.011030 |

| France leaf | <i>Fraxinus excelsior</i> | Location            |
|-------------|---------------------------|---------------------|
| 1           | S1                        | Lake Annecy, France |
| 2           | S2                        | Lake Annecy, France |
| 3           | S3                        | Lake Annecy, France |

| Roots | <i>Fraxinus excelsior</i> | Accession |
|-------|---------------------------|-----------|
| 1     | RI                        | RI        |
| 2     | R2                        | R2        |
| 3     | R3                        | R3        |

**Table S2.** Samples selected for HTS Illumina analysis and their quantity of total DNA (ngul<sup>-1</sup>)

| Place | Plot | Country | Provenance | Tissue | Name  | Name/plot              | DNA yield |
|-------|------|---------|------------|--------|-------|------------------------|-----------|
| R     | 13   | IE      | FNN        | Leaf   | R1 *  | A                      | 93.1      |
| R     | 5    | BE      | HOG        | Leaf   | R2    | A1.A                   | 90.8      |
| R     | 20   | IE      | DON        | Leaf   | R5    | B                      | 81.9      |
| R     | 12   | IE      | Control    | Leaf   | R8    | D1.C                   | 79.7      |
| R     | 11   | DE      | FAR        | Leaf   | R10   | E1.B                   | 83.4      |
| R     | 21   | DE      | KAR        | Leaf   | R13   | F.O                    | 39.2      |
| R     | 24   | GB      | LOC        | Leaf   | R15   | G.B                    | 67        |
| R     | 30   | DK      | RAV        | Leaf   | R17   | G1.B                   | 98.9      |
| R     | 25   | FR      | VSP        | Leaf   | R18   | H                      | 63.5      |
| R     | 1    | DK      | BRE        | Leaf   | R20   | H1.B                   | 91.3      |
| R     | 29   | FR      | SAM        | Leaf   | R21   | I                      | 26        |
| R     | 18   | IT      | ABE        | Leaf   | R22   | I1                     | 111.7     |
| R     | 2    | FR      | ATH        | Leaf   | R23   | K                      | 50.6      |
| R     | 10   | IT      | VAP        | Leaf   | R24   | K1                     | 73.3      |
| R     | 14   | FR      | LAR        | Leaf   | R25   | L                      | 72.4      |
| R     | 33   | IT      | CAD        | Leaf   | R26   | L1                     | 57.7      |
| R     | 31   | GB      | WYW        | Leaf   | R27   | M                      | 69.2      |
| R     | 15   | IT      | MON        | Leaf   | R28   | M1                     | 51.1      |
| R     | 27   | PO      | WLO        | Leaf   | R29   | O1                     | 137       |
| R     | 37   | PO      | WLO        | Leaf   | R30   | O1                     | 66        |
| R     | 28   | LT      | KAL        | Leaf   | R31   | R1.A                   | 130.1     |
| R     | 19   | LT      | ZEI        | Leaf   | R34   | S1.B                   | 76.4      |
| R     | 32   | CZ      | RAB        | Leaf   | R35   | T1.A                   | 139.9     |
| R     | 36   | PO      | MIR        | Leaf   | R38   | U1                     | 85.4      |
| R     | 23   | FR      | SAG        | Leaf   | R39   | Y                      | 55.3      |
| G     | -    | a       | -          | Leaf   | G1 ** | <i>F. texensis</i>     | 75.9      |
| G     | -    | b       | -          | Leaf   | G2    | <i>F. xanthoxu-</i>    | 52.4      |
| G     | -    | c       | -          | Leaf   | G3    | <i>F. glabra</i>       | 78.9      |
| G     | -    | d       | -          | Leaf   | G4    | <i>F. mandshurica</i>  | 138.2     |
| G     | -    | e       | -          | Leaf   | G5    | <i>F. potamophila</i>  | 27.7      |
| G     | -    | f       | -          | Leaf   | G6    | <i>F. americana</i>    | 144.2     |
| G     | -    | g       | -          | Leaf   | G7    | <i>F. pubinervis</i>   | 117.1     |
| G     | -    | h       | -          | Leaf   | G8    | <i>F. angustifolia</i> | 84.5      |
| G     | -    | i       | -          | Leaf   | G10   | <i>F. ornus</i>        | 145.6     |
| G     | -    | i       | -          | Leaf   | G11   | <i>F. ornus</i>        | 71.5      |
| G     | -    | k       | -          | Leaf   | G12   | <i>F. excelsior</i>    | 53.6      |
| G     | -    | l       | -          | Leaf   | G13   | <i>F. divetala</i>     | 117       |
| G     | -    | m       | -          | Leaf   | G14   | <i>F. excelsior</i>    | 125.4     |
| G     | -    | n       | -          | Leaf   | G16   | <i>F. ornus</i>        | 102.5     |
| G     | -    | o       | -          | Leaf   | G17   | <i>F. ornus</i>        | 72.5      |
| G     | -    | p       | -          | Leaf   | G18   | <i>F. numidica</i>     | 42.1      |
| G     | -    | q       | -          | Leaf   | G19   | <i>F. angustifolia</i> | 63.5      |
| G     | -    | r       | -          | Leaf   | G20   | <i>Fraxinus</i> sp.    | 56.4      |
| G     | -    | s       | -          | Leaf   | G21   | <i>Fraxinus</i> (un-   | 140.1     |
| G     | -    | t       | -          | Leaf   | G22   | <i>F. excelsior</i>    | 21.5      |
| G     | -    | u       | -          | Leaf   | G23   | <i>F. pennsylvan-</i>  | 78.6      |
| F     | -    | -       | ABL        | Leaf   | F1 °  | <i>Fraxinus</i> sp.    | 24.2      |
| F     | -    | -       | ABL        | Leaf   | F2    | <i>Fraxinus</i> sp.    | 27.1      |
| F     | -    | -       | ABL        | Leaf   | F3    | <i>Fraxinus</i> sp.    | 41.2      |
| R     | 3    | FR      | SPD        | Seed   | S1 w  | O (2.3)                | 93        |
| R     | 20   | IE      | DON        | Seed   | S3    | B (6.6)                | 102.6     |
| R     | 13   | IE      | ENN        | Seed   | S5    | A (5.4)                | 31.1      |
| R     | 25   | FR      | VSP        | Seed   | S6    | H (5.5)                | 58.2      |
| R     | 20   | IE      | DON        | Seed   | S7    | B (1.3)                | 39.2      |
| R     | 2    | FR      | ATH        | Seed   | S8    | K (1.6)                | 54.4      |
| R     | 12   | NL      | VCS        | Seed   | S9    | D1 (4.4)               | 98.8      |
| R     | 9    | GB      | SET        | Seed   | S10   | E (2.5)                | 39.4      |
| R     | 4    | FR      | DOU        | Seed   | S11   | Z (2.2)                | 48.4      |

|   |    |    |         |      |     |                       |       |
|---|----|----|---------|------|-----|-----------------------|-------|
| R | 17 | IE | Control | Seed | S12 | D (3.5)               | 247.3 |
| R | 7  | IE | CUR     | Seed | S13 | C (2.2)               | 34.5  |
| R | 6  | FR | SPF     | Seed | S14 | U (5.5)               | 47.9  |
| R | 36 | PO | MIR     | Seed | S15 | U1 (2.4)              | 39.7  |
| R | 30 | DK | RAV     | Seed | S16 | G1 (b)                | 51.8  |
| R | 24 | GB | LOC     | Seed | S17 | G (5.4)               | 32.8  |
| G | -  | v  | -       | Seed | SG1 | v                     | 121   |
| G | -  | n  | -       | Seed | SG2 | <i>F.ornus</i>        | 98.3  |
| G | -  | w  | -       | Seed | SG3 | <i>F.ornus</i>        | 22.5  |
| G | -  | s  | -       | Seed | SG5 | x                     | 66.2  |
| G | -  | e  | -       | Seed | SG6 | <i>F. potamophila</i> | 34.2  |
| G | -  | d  | -       | Seed | SG7 | <i>F. mandshurica</i> | 11.9  |

\*R1-R39 = Leaflets from Roosky; \*\*G1-G23= Leaflets from Glasnevin; °F1-F3= Leaflets from France; ®S1-S17= Seed extract from Roosky; ®SG1-SG7=Seed extracts from Glasnevin; Belgium – BE, Czech republic – CZ, Denmark – DK, France – FR, Germany – DE, Ireland – IE, Italy – IT, Lithuania – LT, Netherland – NL, Poland – PO, UK – GB; Abeton (IT) - ABE, Athis (FR) - ATH, Au BoutduLac – ABL, Bregentved (DK)-BRE, Cadore (IT)-CAD, Currachase (IE)- CUR, Donadea (IR)-DON, Dourdan – DOU, Enniskillen (IE)-ENN, Farchau (DE)-FAR, Hoge Bos (BE)-HOG, Kalsiadorys (LT)- KAL, Karlsruhe (DE) -KAR, La Romagne (FR)-LAR, Loch Tay (GB)-LOC, Mircze (PO)- MIR, Monte Lessini (IT)- MON, Rabstejn (CZ)- RAB, Ravenholt (DK)- RAV, Saint Gatien (FR)- SAG, Saint Martin (FR) – SAM, Settrington (GB)- SET, St Paul De Salers – SPD, St. Pierre des fleurs – SPF, Vaartbos Com.seed (NL) – VCS, Val Saint Pierre (FR) – VSP, Valle Pesio (IT)- VAP, Wloszczowa (PO) – WLO, Wytham Wood (GB)- WYW, Zeimelis (LT)- ZEI; accession number XX.011046 – a, 2003.0735 – b, 1909.011054 – c, 1934.011053 – d, 1932.011031 – e, 2001.1739 – f, 1954.011044 – g, XX.011028 – h, 1977.0039 – i, 2005.0652 – j, XX.011040 – k, XX.011038 – l, XX.011029 – m, 1969.011033 – n, XX.011034 – o, 1904.011032 – p, XX.011074 – q, 2006.1641 – r, GPS -78 – s, XX.011048 – t, 1889.011030 – u. GPS-91 – v, GPS-83 – w, GPS 81- x.

**Table S3.** Primer information for each DNA barcoding locus used (nrITS, *tef* and LSU).

| Primer         | Primer sequence               | Reference                  |
|----------------|-------------------------------|----------------------------|
| <b>Forward</b> |                               |                            |
| ITS-1          | 5' TCCGTAGGTGAACCTGCGG 3'     | White <i>et al.</i> (1990) |
| ITS-1F         | 5' CTTGGTCATTTAGAGGAAGTAA 3'  | Gardes and Bruns (1993)    |
| ITS-5          | 5' GGAAGTAAAAGTCGTAACAAGG 3'  | White <i>et al.</i> (1990) |
| LROR (LSU)     | 5' ACCCGCTGAACCTTAAGC 3'      | Vilgalys and Hester (1990) |
| Tef-983        | 5' GCYCCYGGHCAYCGTGAYTTYAT 3' | Rehner and Buckley (2005)  |
| <b>Reverse</b> |                               |                            |
| ITS-4          | 5' TCCTCCGCTTATTGATATGC 3'    | White <i>et al.</i> (1990) |
| LR5 (LSU)      | 5' TCCTGAGGGAACTTCG 3'        | Vilgalys and Hester (1990) |
| Tef-1576       | 5' ACHGTRCCRATACCACCRATCTT 3' | Rehner and Buckley (2005)  |

**Table S4.** Frequencies for each of the OTUs at the study sites. Roosky and Glasnevin are leaf endophytes; Kinsealy are root endophytes.

| No. | OTU                                 | GenBank Accession  | Tissue    | Roosky, L                     | Glasnevin, L | Kinsealy, R |
|-----|-------------------------------------|--------------------|-----------|-------------------------------|--------------|-------------|
|     |                                     |                    | specific- | Frequencies of OTUs recovered |              |             |
| 1   | <i>Acremonium alternatum</i>        | +                  | R         | -                             | -            | 1*          |
| 2   | <i>Acremonium</i> sp.               | MZ509281           | L         | 2                             | 2            | -           |
| 3   | <i>Akanthomyces attenuatus</i>      | +                  | L         | -                             | 1            | -           |
| 4   | <i>Akanthomyces lecanii</i>         | MZ509282; MZ509283 | R         | -                             | -            | 2           |
| 5   | <i>Akanthomyces muscarium</i>       | +                  | L         | -                             | 1            | -           |
| 6   | <i>Alternaria humuli</i>            | +                  | L         | 1                             | -            | -           |
| 7   | <i>Alternaria</i> sp.               | MZ509284           | L         | 1                             | -            | -           |
| 8   | <i>Aspergillus versicolor</i>       | MZ509285           | L         | -                             | 1            | -           |
| 9   | <i>Aureobasidium pullulans</i>      | MZ509286; MZ509287 | L         | 1                             | 1            | -           |
| 10  | <i>Aureobasidium</i> sp.            | +                  | L         | 1                             | 1            | -           |
| 11  | <i>Bjerkandera adusta</i>           | MZ509288           | L         | 1                             | -            | -           |
| 12  | <i>Boeremia exigua</i>              | MZ509289; MZ509290 | L         | 58                            | 2            | -           |
| 13  | <i>Boeremia hedericola</i>          | MZ509291           | L         | 5                             | -            | -           |
| 14  | <i>Boeremia</i> sp.                 | +                  | L         | 1                             | -            | -           |
| 15  | <i>Boeremia strasseri</i>           | MZ509292           | L         | 2                             | -            | -           |
| 16  | <i>Boeremia trachelospermi</i>      | +                  | L         | 6                             | -            | -           |
| 17  | <i>Botrytis cinerea</i>             | MZ509293           | L         | 1                             | -            | -           |
| 18  | <i>Cadophora meredithiae</i>        | +                  | R         | -                             | -            | 1           |
| 19  | <i>Cadophora</i> sp.                | MZ509294           | Both R    | 1                             | -            | 5           |
| 20  | <i>Cladosporium allicinum</i>       | MZ509295           | L         | 2                             | -            | -           |
| 21  | <i>Cladosporium cladosporioides</i> | MZ509296           | Both R    | 1                             | -            | 1           |
| 22  | <i>Cladosporium floccosum</i>       | +                  | L         | -                             | 1            | -           |
| 23  | <i>Cladosporium herbarum</i>        | MZ509297; MZ509298 | L         | 1                             | -            | -           |
| 24  | <i>Cladosporium kenpeggii</i>       | MZ509299           | L         | -                             | 1            | -           |
| 25  | <i>Cladosporium perangustum</i>     | +                  | L         | -                             | 1            | -           |
| 26  | <i>Cladosporium</i> sp.             | MZ509300; MZ509301 | L         | 6                             | 6            | -           |
| 27  | <i>Cladosporium westerdijkiae</i>   | +                  | R         | -                             | -            | 1           |
| 28  | <i>Collembolisporea aristata</i>    | MZ506894           | L         | -                             | 1            | -           |
| 29  | <i>Colletotrichum godetiae</i>      | MZ509302           | L         | -                             | 1            | -           |
| 30  | <i>Coprinopsis</i> sp.              | MZ509303           | L         | 1                             | -            | -           |
| 31  | <i>Cystobasidium slooffiae</i>      | MZ509304           | L         | -                             | 1            | -           |
| 32  | <i>Dactylonectria alcacerensis</i>  | MZ509305           | R         | -                             | -            | 1           |
| 33  | <i>Dactylonectria hordeicola</i>    | MZ509306           | R         | -                             | -            | 6           |
| 34  | <i>Dactylonectria macrodidyma</i>   | MZ509307           | R         | -                             | -            | 20          |
| 35  | <i>Dactylonectria torresensis</i>   | MZ509308           | R         | -                             | -            | 2           |
| 36  | <i>Diaporthe cotoneastri</i>        | +                  | L         | -                             | 2            | -           |
| 37  | <i>Diaporthe passiflorae</i>        | MZ509309           | L         | 5                             | -            | -           |
| 38  | <i>Diaporthe rudis</i>              | MZ509310           | L         | 1                             | 2            | -           |
| 39  | <i>Diaporthe</i> sp.                | MZ509311           | L         | 2                             | -            | -           |
| 40  | <i>Diaporthe viticola</i>           | MZ509312           | L         | 2                             | 2            | -           |
| 41  | <i>Dictyochaeta siamensis</i>       | MZ509313; MZ506890 | L         | 1                             | -            | -           |
| 42  | <i>Ectophoma multirostrata</i>      | MZ509314           | L         | 2                             | -            | -           |
| 43  | <i>Epichloe typhina</i>             | MZ509315           | R         | -                             | -            | 1           |
| 44  | <i>Epicoccum nigrum</i>             | MZ509316           | Both R    | 6                             | -            | 2           |
| 45  | <i>Epicoccum</i> sp.                | MZ509317           | L         | 4                             | -            | -           |

|    |                                    |                    |        |    |   |   |
|----|------------------------------------|--------------------|--------|----|---|---|
| 46 | <i>Eutypa spinosa</i>              | MZ509318           | L      | -  | 1 | - |
| 47 | <i>Exophiala oligosperma</i>       | MZ509319           | L      | -  | 2 | - |
| 48 | <i>Fimetariella rabenhorstii</i>   | MZ509320           | L      | 1  | - | - |
| 49 | <i>Fusarium avenaceum</i>          | MZ509321; MZ509322 | L      | 1  | 1 | - |
| 50 | <i>Fusarium culmorum</i>           | MZ509323           | Both R | -  | 1 | 7 |
| 51 | <i>Fusarium lateritium</i>         | MZ509324           | L      | 12 | 8 | - |
| 52 | <i>Fusarium oxysporum</i>          | MZ509325           | Both R | 1  | 2 | 5 |
| 53 | <i>Fusarium proliferatum</i>       | MZ509326           | L      | 1  | 2 | - |
| 54 | <i>Fusarium</i> sp.                | MZ509327           | L      | 2  | 1 | - |
| 55 | <i>Fusarium tricinctum</i>         | MZ509328           | L      | 1  | - | - |
| 56 | <i>Gibberella</i> sp.              | +                  | L      | 1  | - | - |
| 57 | <i>Gloniopsis calami</i>           | +                  | L      | -  | 1 | - |
| 58 | <i>Harzia velata</i>               | +                  | R      | -  | - | 2 |
| 59 | <i>Hydropisphaera</i> sp.          | MZ509329           | R      | -  | - | 1 |
| 60 | <i>Ilyonectria destructans</i>     | MZ509330           | R      | -  | - | 1 |
| 61 | <i>Ilyonectria radicola</i>        | MZ509331           | R      | -  | - | 6 |
| 62 | <i>Ilyonectria robusta</i>         | MZ509332           | R      | -  | - | 2 |
| 63 | <i>Ilyonectria</i> sp.             | MZ509333           | R      | -  | - | 5 |
| 64 | <i>Juxtiphoma eupyrena</i>         | MZ509334           | R      | -  | - | 2 |
| 65 | <i>Kalmusia</i> sp.                | +                  | L      | 1  | - | - |
| 66 | <i>Lecanicillium</i> sp.           | +                  | R      | -  | - | 1 |
| 67 | <i>Leptosphaerulina australis</i>  | +                  | L      | 1  | - | - |
| 68 | <i>Leptosphaerulina trifolii</i>   | MZ509337           | L      | 1  | - | - |
| 69 | <i>Laetisaria roseipellis</i>      | MZ509335           | L      | -  | 1 | - |
| 70 | <i>Laetisaria</i> sp.              | MZ509336           | L      | -  | 2 | - |
| 71 | <i>Meyerozyma guilliermondii</i>   | MZ509338           | L      | -  | 2 | - |
| 72 | <i>Mollisia</i> sp.                | +                  | L      | 1  | - | - |
| 73 | <i>Mycochaetophora</i> sp.         | +                  | R      | -  | - | 1 |
| 74 | <i>Mycosphaerella coacervata</i>   | MZ509339           | L      | 28 | 3 | - |
| 75 | <i>Mycosphaerella</i> sp.          | MZ509340           | L      | 3  | - | - |
| 76 | <i>Naganishia diffluens</i>        | +                  | L      | 4  | - | - |
| 77 | <i>Nectria</i> sp.                 | MZ509341           | R      | -  | - | 1 |
| 78 | <i>Neoceratosperma eucalypti</i>   | +                  | L      | 1  | - | - |
| 79 | <i>Neofabraea vagabunda</i>        | MZ509342           | L      | -  | 1 | - |
| 80 | <i>Neonectria candida</i>          | MZ509343           | R      | -  | - | 1 |
| 81 | <i>Neonectria punicea</i>          | +                  | R      | -  | - | 2 |
| 82 | <i>Neonectria radicola</i>         | MZ509344           | R      | -  | - | 1 |
| 83 | <i>Neonectria</i> sp.              | MZ509345; MZ509346 | R      | -  | - | 9 |
| 84 | <i>Ophiocordyceps crassisporea</i> | +                  | R      | -  | - | 2 |
| 85 | <i>Ophiosphaerella korrae</i>      | MZ506893           | L      | 2  | - | - |
| 86 | <i>Paraconiothyrium</i> sp.        | MZ509347           | L      | 1  | - | - |
| 87 | <i>Paraloratospora gahniae</i>     | MZ509348           | L      | 2  | - | - |
| 88 | <i>Parengyodontium album</i>       | MZ509349           | L      | 4  | 2 | - |
| 89 | <i>Penicillium expansum</i>        | +                  | L      | -  | 1 | - |
| 90 | <i>Penicillium griseoroseum</i>    | MZ509350           | L      | 1  | - | - |
| 91 | <i>Penicillium</i> sp.             | MZ509351           | L      | 1  | - | - |
| 92 | <i>Penicillium spathulatum</i>     | MZ509352           | R      | -  | - | 1 |
| 93 | <i>Phaeosphaeria pontiformis</i>   | MZ509354           | L      | 1  | - | - |
| 94 | <i>Phlebia rufa</i>                | MZ509355           | L      | 1  | - | - |

|                                              |                                    |                    |   |                |               |                |
|----------------------------------------------|------------------------------------|--------------------|---|----------------|---------------|----------------|
| 95                                           | <i>Phoma</i> sp.                   | MZ509353; MZ509356 | L | 12             | 2             | -              |
| 96                                           | <b><i>Phomopsis</i> sp.</b>        | MZ509357           | L | -              | 2             | -              |
| 97                                           | <i>Phomopsis velata</i>            | MZ509358           | L | 1              | 1             | -              |
| 98                                           | <i>Psiloglonium</i> sp.            | MZ509359; MZ509360 | R | -              | -             | 4              |
| 99                                           | <i>Pyronema domesticum</i>         | MZ509361; MZ506892 | L | 1              | 1             | -              |
| 100                                          | <i>Sarocladium strictum</i>        | MZ509362; MZ509363 | L | 2              | -             | -              |
| 101                                          | <i>Septoria convolvuli</i>         | +                  | L | 1              | -             | -              |
| 102                                          | <i>Septoria cucubali</i>           | MZ509364; MZ506891 | L | 5              | -             | -              |
| 103                                          | <b><i>Septoria lepidiicola</i></b> | +                  | L | -              | 1             | -              |
| 104                                          | <b><i>Septoria protearum</i></b>   | MZ509365; MZ509366 | L | -              | 1             | -              |
| 105                                          | <i>Septoriella dactylidis</i>      | MZ509368           | L | 1              | -             | -              |
| 106                                          | <i>Sistotrema brinkmannii</i>      | MZ509369           | L | 1              | -             | -              |
| 107                                          | <i>Trichoderma viride</i>          | MZ509370           | R | -              | -             | 3              |
| 108                                          | <i>Ustilaginoidea virens</i>       | MZ509371           | L | 1              | -             | -              |
| 109                                          | <b><i>Ustilago filiformis</i></b>  | +                  | L | -              | 2             | -              |
| 110                                          | <i>Vishniacozyma heimaeyensis</i>  | MZ509372           | L | 1              | -             | -              |
| 111                                          | <b><i>Vuilleminia coryli</i></b>   | +                  | L | -              | 1             | -              |
| 112                                          | <i>Xylaria</i> sp.                 | MZ509373           | L | 5              | -             | -              |
| <b>Total no. of isolates, total no. OTUs</b> |                                    |                    |   | <b>219, 61</b> | <b>69, 41</b> | <b>100, 32</b> |

Bold font = other *Fraxinus* species only (not *F. excelsior*); Tissue specificity: L=Leaf only, R=Root only

Genbank absent from some taxa (indicated with +) because they did not reach quality threshold for submission (available on request).

**Table S5.** Total number of isolates and OTUs within each class and family from all leaf and root endophytes. Asco.= Ascomycota; Basid.= Basidiomycota.

| Class (Division, Subdivision)                  | Isolates | OTUs | Family              | Isolates | OTUs |
|------------------------------------------------|----------|------|---------------------|----------|------|
| Dothideomycetes (Asco., Pezizomycotina)        | 195      | 40   | Aspergillaceae      | 5        | 5    |
| Eurotiomycetes (Asco., Pezizomycotina)         | 7        | 6    | Bionectriaceae      | 1        | 1    |
| Leotiomycetes (Asco., Pezizomycotina)          | 6        | 6    | Bulleribasidiaceae  | 1        | 1    |
| Pezizomycetes (Asco., Pezizomycotina)          | 2        | 1    | Ceratostomataceae   | 2        | 1    |
| Sordariomycetes (Asco., Pezizomycotina)        | 162      | 47   | Chaetosphaeriaceae  | 1        | 1    |
| Saccharomycetes (Asco., Saccharomycotina)      | 2        | 1    | Cladosporiaceae     | 21       | 8    |
| Agaricomycetes (Basid., Agaricomycotina)       | 8        | 7    | Clavicipitaceae     | 1        | 1    |
| Tremellomycetes (Basid., Agaricomycotina)      | 5        | 2    | Cordycipitaceae     | 11       | 5    |
| Cystobasidiomycetes (Basid., Pucciniomycotina) | 1        | 1    | Corticaceae         | 4        | 3    |
| Ustilaginomycetes (Basid., Ustilaginomycotina) | 2        | 1    | Cystobasidiaceae    | 1        | 1    |
| -                                              | -        | -    | Debaryomycetaceae   | 2        | 1    |
| -                                              | -        | -    | Dermateaceae        | 2        | 2    |
| -                                              | -        | -    | Diaporthaceae       | 20       | 7    |
| -                                              | -        | -    | Diatrypaceae        | 1        | 1    |
| -                                              | -        | -    | Didymellaceae       | 104      | 10   |
| -                                              | -        | -    | Didymosphaeriaceae  | 2        | 2    |
| -                                              | -        | -    | Dothioraceae        | 4        | 2    |
| -                                              | -        | -    | Filobasidiaceae     | 4        | 1    |
| -                                              | -        | -    | Glomerellaceae      | 1        | 1    |
| -                                              | -        | -    | Helotiales          | 9        | 4    |
| -                                              | -        | -    | Herpotrichiellaceae | 2        | 1    |
| -                                              | -        | -    | Hydnaceae           | 1        | 1    |

|   |   |   |                      |    |    |
|---|---|---|----------------------|----|----|
| - | - | - | Hypocreaceae         | 3  | 1  |
| - | - | - | Hypocreales          | 20 | 7  |
| - | - | - | Hysteriaceae         | 5  | 2  |
| - | - | - | Lasiosphaeriaceae    | 1  | 1  |
| - | - | - | Meruliaceae          | 2  | 2  |
| - | - | - | Mycosphaerellaceae   | 45 | 7  |
| - | - | - | Nectriaceae          | 89 | 17 |
| - | - | - | Ophiocordycipitaceae | 2  | 1  |
| - | - | - | Phaeosphaeriaceae    | 6  | 4  |
| - | - | - | Pleosporaceae        | 4  | 4  |
| - | - | - | Psathyrellaceae      | 1  | 1  |
| - | - | - | Pyronemataceae       | 2  | 1  |
| - | - | - | Sarocladiaceae       | 2  | 1  |
| - | - | - | Sclerotiniaceae      | 1  | 1  |
| - | - | - | Ustilaginaceae       | 2  | 1  |
| - | - | - | Xylariaceae          | 5  | 1  |

**Table S6.** OTU frequencies obtained from all sampled leaf tissues from all provenances in the Roosky provenance trial for *Fraxinus excelsior*.

|                                 | Country      |          |          |          |          |          |          |          |          |          |          |
|---------------------------------|--------------|----------|----------|----------|----------|----------|----------|----------|----------|----------|----------|
| OTU                             | BE           | CZ       | DK       | FR       | DE       | IE       | IT       | LT       | NL       | PO       | GB       |
|                                 | <b>Count</b> |          |          |          |          |          |          |          |          |          |          |
| <i>Acremonium</i> sp.           | -            | <b>1</b> | -        | -        | <b>1</b> | -        | -        | -        | -        | -        | -        |
| <i>Alternaria humuli</i>        | -            | -        | -        | -        | -        | -        | -        | -        | -        | <b>1</b> | -        |
| <i>Alternaria</i> sp.           | -            | <b>1</b> | -        | -        | -        | -        | -        | -        | -        | -        | -        |
| <i>Aureobasidium pullulans</i>  | -            | -        | -        | -        | -        | -        | <b>1</b> | -        | -        | -        | -        |
| <i>Aureobasidium</i> sp.        | -            | -        | <b>1</b> | -        | -        | -        | -        | -        | -        | -        | -        |
| <i>Bjerkandera adusta</i>       | -            | -        | -        | -        | -        | -        | -        | -        | -        | -        | <b>1</b> |
| <i>Boeremia exigua</i>          | <b>1</b>     | <b>8</b> | <b>9</b> | <b>6</b> | <b>6</b> | <b>5</b> | <b>8</b> | <b>3</b> | <b>6</b> | <b>3</b> | <b>3</b> |
| <i>Boeremia hedericola</i>      | -            | <b>2</b> | -        | -        | <b>1</b> | -        | <b>1</b> | -        | -        | <b>1</b> | -        |
| <i>Boeremia</i> sp.             | -            | -        | -        | -        | -        | -        | -        | <b>1</b> | -        | -        | -        |
| <i>Boeremia strasseri</i>       | -            | -        | -        | <b>1</b> | -        | -        | -        | -        | -        | -        | <b>1</b> |
| <i>Boeremia trachelospermi</i>  | -            | -        | -        | <b>3</b> | <b>1</b> | -        | <b>1</b> | -        | -        | <b>1</b> | -        |
| <i>Botrytis cinerea</i>         | -            | -        | -        | -        | -        | -        | -        | <b>1</b> | -        | -        | -        |
| <i>Cadophora</i> sp.            | -            | -        | -        | -        | -        | <b>1</b> | -        | -        | -        | -        | -        |
| <i>Cladosporium allicinum</i>   | -            | -        | <b>1</b> | -        | -        | -        | -        | -        | -        | -        | -        |
| <i>Cladosporium cladospori-</i> | -            | -        | -        | -        | -        | <b>1</b> | -        | -        | -        | -        | -        |
| <i>Cladosporium herbarum</i>    | -            | -        | -        | -        | -        | -        | -        | -        | -        | -        | <b>1</b> |
| <i>Cladosporium</i> sp.         | -            | -        | <b>1</b> | -        | -        | <b>1</b> | -        | <b>1</b> | <b>1</b> | -        | <b>2</b> |
| <i>Coprinospsis</i> sp.         | -            | -        | -        | -        | -        | -        | -        | <b>1</b> | -        | -        | -        |
| <i>Diaporthe passiflorae</i>    | -            | -        | <b>1</b> | -        | <b>1</b> | <b>1</b> | -        | <b>1</b> | -        | <b>1</b> | -        |
| <i>Diaporthe rudis</i>          | -            | -        | -        | -        | <b>1</b> | -        | -        | -        | -        | -        | -        |
| <i>Diaporthe</i> sp.            | -            | -        | -        | -        | -        | <b>1</b> | -        | -        | -        | -        | <b>1</b> |
| <i>Diaporthe viticola</i>       | -            | -        | -        | -        | -        | <b>1</b> | <b>1</b> | -        | -        | -        | -        |
| <i>Dictyochoeta siamensis</i>   | -            | -        | -        | -        | -        | -        | -        | -        | <b>1</b> | -        | -        |



|                                   |            |            |            |            |            |            |            |            |            |            |            |
|-----------------------------------|------------|------------|------------|------------|------------|------------|------------|------------|------------|------------|------------|
| <i>Ectophoma multirostrata</i>    | -          | -          | 1          | -          | 1          | -          | -          | -          | -          | -          | -          |
| <i>Epicoccum nigrum</i>           | 1          | -          | -          | -          | -          | 1          | 1          | 1          | -          | -          | 2          |
| <i>Epicoccum</i> sp.              | -          | -          | -          | -          | -          | 1          | 1          | 1          | -          | -          | 1          |
| <i>Fimetariella rabenhorstii</i>  | -          | -          | -          | -          | -          | -          | -          | -          | 1          | -          | -          |
| <i>Fusarium avenaceum</i>         | -          | -          | -          | -          | -          | 1          | -          | -          | -          | -          | -          |
| <i>Fusarium lateritium</i>        | -          | -          | 1          | 1          | 4          | 1          | 1          | -          | 2          | 1          | 1          |
| <i>Fusarium oxysporum</i>         | -          | -          | -          | -          | -          | -          | -          | -          | -          | -          | 1          |
| <i>Fusarium proliferatum</i>      | -          | -          | -          | -          | -          | -          | -          | -          | -          | 1          | -          |
| <i>Fusarium</i> sp.               | -          | -          | 1          | 1          | -          | -          | -          | -          | -          | -          | -          |
| <i>Fusarium tricinctum</i>        | -          | -          | -          | -          | -          | -          | 1          | -          | -          | -          | -          |
| <i>Gibberella</i> sp.             | -          | -          | -          | -          | -          | -          | -          | -          | -          | 1          | -          |
| <i>Kalmusia</i> sp.               | -          | -          | -          | 1          | -          | -          | -          | -          | -          | -          | -          |
| <i>Leptosphaerulina australis</i> | -          | -          | 1          | -          | -          | -          | -          | -          | -          | -          | -          |
| <i>Leptosphaerulina trifolii</i>  | -          | -          | -          | 1          | -          | -          | -          | -          | -          | -          | -          |
| <i>Mollisia</i> sp.               | -          | -          | -          | -          | -          | -          | -          | -          | -          | 1          | -          |
| <i>Mycosphaerella coacervata</i>  | 2          | 2          | 2          | 7          | -          | 3          | 5          | 3          | 1          | 1          | 3          |
| <i>Mycosphaerella</i> sp.         | 1          | -          | -          | -          | 1          | -          | -          | -          | -          | -          | 1          |
| <i>Naganishia diffluens</i>       | 2          | -          | -          | 1          | -          | -          | -          | -          | -          | -          | 1          |
| <i>Neoceratosperma eucalypti</i>  | -          | 1          | -          | -          | -          | -          | -          | -          | -          | -          | -          |
| <i>Ophiosphaerella korrae</i>     | 2          | -          | -          | -          | -          | -          | -          | -          | -          | -          | -          |
| <i>Paraconiothyrium</i> sp.       | -          | -          | -          | 1          | -          | -          | -          | -          | -          | -          | -          |
| <i>Paroloratospora gahniae</i>    | -          | -          | 1          | -          | -          | 1          | -          | -          | -          | -          | -          |
| <i>Parengyodontium album</i>      | -          | -          | -          | 2          | -          | 1          | -          | 1          | -          | -          | -          |
| <i>Penicillium griseoroseum</i>   | -          | -          | -          | -          | -          | -          | -          | -          | -          | 1          | -          |
| <i>Penicillium</i> sp.            | -          | 1          | -          | -          | -          | -          | -          | -          | -          | -          | -          |
| <i>Phaeosphaeria pontiformis</i>  | -          | -          | -          | -          | 1          | -          | -          | -          | -          | -          | -          |
| <i>Phlebia rufa</i>               | 1          | -          | -          | -          | -          | -          | -          | -          | -          | -          | -          |
| <i>Phoma</i> sp.                  | 2          | 2          | 3          | -          | 1          | 2          | -          | -          | 1          | -          | 1          |
| <i>Phomopsis velata</i>           | -          | -          | -          | -          | -          | -          | -          | -          | 1          | -          | -          |
| <i>Pyronema domesticum</i>        | -          | -          | -          | -          | -          | 1          | -          | -          | -          | -          | -          |
| <i>Sarocladium strictum</i>       | -          | -          | -          | -          | -          | -          | 1          | -          | -          | 1          | -          |
| <i>Septoria convolvuli</i>        | -          | -          | -          | -          | -          | -          | -          | 1          | -          | -          | -          |
| <i>Septoria cucubali</i>          | 1          | -          | -          | 1          | -          | 1          | -          | 1          | -          | 1          | -          |
| <i>Septoriella dactylidis</i>     | -          | -          | -          | -          | -          | -          | -          | -          | -          | -          | 1          |
| <i>Sistotrema brinkmannii</i>     | -          | -          | -          | -          | -          | 1          | -          | -          | -          | -          | -          |
| <i>Ustilaginoidea virens</i>      | -          | -          | -          | -          | -          | -          | -          | 1          | -          | -          | -          |
| <i>Vishniacozyma heimaeyen-</i>   | -          | -          | -          | -          | -          | -          | 1          | -          | -          | -          | -          |
| <i>Xylaria</i> sp.                | -          | -          | -          | 1          | 2          | 1          | -          | -          | -          | -          | 1          |
| <b>Total no. of isolates</b>      | <b>13</b>  | <b>18</b>  | <b>23</b>  | <b>27</b>  | <b>21</b>  | <b>26</b>  | <b>23</b>  | <b>17</b>  | <b>14</b>  | <b>15</b>  | <b>22</b>  |
| <b>Total no. of taxa</b>          | <b>9</b>   | <b>8</b>   | <b>12</b>  | <b>13</b>  | <b>12</b>  | <b>19</b>  | <b>12</b>  | <b>13</b>  | <b>8</b>   | <b>13</b>  | <b>16</b>  |
| <b>No. of taxa per sample</b>     | <b>0.7</b> | <b>0.4</b> | <b>0.5</b> | <b>0.5</b> | <b>0.6</b> | <b>0.7</b> | <b>0.5</b> | <b>0.8</b> | <b>0.6</b> | <b>0.9</b> | <b>0.7</b> |

BE-Belgium, CZ-Czech Republic, DK-Denmark, FR-France, DE-Germany, IE-Ireland, IT-Italy, LT-Lithuania, NL-Netherlands, PO-Poland, GB-UK.

**Table S7.** OTUs assigned to respective taxonomic level with total numbers of OTU obtained from seeds and leaves by HTS in the culture independent assessments.

| Kingdom (OTU)      | Phylum (OTU)    | Class (OTU)              | Order (OTU)           | Family (OTU)             |
|--------------------|-----------------|--------------------------|-----------------------|--------------------------|
| Fungi (71)         | Ascomycota (56) | Dothideomycetes (28)     | Botryosphaeriales (2) | Botryosphaeriaceae (2)   |
|                    |                 |                          |                       | Capnodiaceae (2)         |
|                    |                 |                          |                       | Capnodiales (3)          |
|                    |                 |                          |                       | Mycosphaerellaceae (1*)  |
|                    |                 |                          |                       | Dothideales (2)          |
|                    |                 |                          |                       | Dothioraceae (1*)        |
|                    |                 |                          |                       | Myriangiales (3)         |
|                    |                 |                          |                       | Elsinoaceae (2*)         |
|                    |                 |                          |                       | Pleosporales (18)        |
|                    |                 |                          |                       | Didymosphaeriaceae (1)   |
|                    |                 |                          |                       | Montagnulaceae (3)       |
|                    |                 |                          |                       | Leptosphaeriaceae (3*)   |
|                    |                 |                          |                       | Phaeosphaeriaceae (6*)   |
|                    |                 |                          |                       | Pleosporaceae (3*)       |
|                    |                 |                          |                       | Venturiales (2)          |
|                    |                 |                          |                       | Venturiaceae (1*)        |
|                    |                 | Eurotiomycetes (9)       | Chaetothyriales (3)   | Chaetothyriaceae (1)     |
|                    |                 |                          |                       | Herpotrichiellaceae (1*) |
|                    |                 |                          |                       | Eurotiales (6)           |
|                    |                 |                          | Verrucariales (1)     | Trichocomaceae (6)       |
|                    |                 |                          |                       | Verrucariaceae (1*)      |
|                    |                 | Lecanoromycetes (3)      | Lecanorales (1)       | Ramalinaceae (1)         |
|                    |                 |                          | Teloschistales (2)    | Teloschistaceae (2)      |
|                    |                 | Leotiomycetes (3*)       | Erysiphales (1)       | Erysiphaceae (1)         |
|                    |                 |                          | Helotiales (3)        | Helotiaceae (1*)         |
|                    |                 |                          | –                     | Vibrissaceae (1*)        |
|                    |                 | Pezizomycetes (1)        | Pezizales (1)         | Ascobolaceae (1*)        |
|                    |                 | Sordariomycetes (7*)     | Diaporthales (2*)     | Diaporthaceae (2*)       |
|                    |                 |                          | Hypocreales (3*)      | Clavicipitaceae (1*)     |
|                    |                 |                          |                       | Hypocreaceae (1*)        |
|                    |                 |                          |                       | Nectriaceae (1)          |
|                    |                 |                          |                       | Glomerellales (1)        |
|                    |                 |                          | Melanosporales (1)    | Glomerellaceae (1)       |
|                    |                 |                          |                       | Ceratostomataceae (1)    |
|                    |                 |                          | Sordariales (2)       | Sordariaceae (1*)        |
|                    |                 |                          | Taphrinales (5*)      | Taphrinaceae (5*)        |
|                    |                 |                          |                       |                          |
| Basidiomycota (11) |                 |                          | Polyporales (1)       | Fomitopsidaceae (1)      |
|                    |                 |                          |                       | Agaricales (1*)          |
|                    |                 |                          | Agaricomycetes (2)    | –                        |
|                    |                 |                          |                       | Peniophoraceae           |
|                    |                 | Agaricostilbomycetes (1) | Agaricostilboles (1*) | Agaricostilbaceae (1*)   |
|                    |                 |                          | – *                   | Kondoaceae (*)           |
|                    |                 | Cystobasidiomycetes (1*) | – *                   | – *                      |
|                    |                 |                          | – *                   | – *                      |
|                    |                 | Exobasidiomycetes (3*)   | Micostromatales (1)   | Microstromataceae (1)    |
|                    |                 |                          | Entylomatales (1)     | Entylomataceae (1)       |

|                     |                         |                     |                          |
|---------------------|-------------------------|---------------------|--------------------------|
|                     | Microbotryomycetes (1*) | Sporidiobolales (1) | Sporidiobolaceae (1)     |
|                     |                         | —*                  | —*                       |
|                     | Tremellomycetes (4*)    | Tremellales (3*)    | Tremellaceae (1)         |
|                     |                         |                     | Bulleraceae (1)          |
|                     |                         | Cystofilobasidiales |                          |
|                     |                         | (1*)                | Cystofilobasidiaceae (1) |
|                     |                         | —*                  | —*                       |
| Chytridiomycota (1) | Chytridiomycetes (1)    | Rhizophydiales (1)  | —*                       |
| Zygomycota (3)      | Mucoromycetes (3)       | Mucorales (2)       | Mucoraceae (2)           |
|                     |                         | —*                  | Rhizopodaceae (1)        |
| Chromista(3)        | Oomycota (3)            | Oomycetes (3)       | Pythiales (3)            |
|                     |                         |                     | Pythiaceae (3)           |

\* indicates unidentified reads are present in that level.

**Table S8.** Dominant fungal endophytes identified from seed taken from two sites, Roosky and Glasnevin using the HTS of plant material. OTUs highlighted in bold are shared among sites and considered core.

| Seed endophytes                            | Roosky | Glasnevin |
|--------------------------------------------|--------|-----------|
| <b><i>Aspergillus niger</i></b>            | 1      | 1         |
| <i>Aspergillus nomiae</i>                  | 1      | 0         |
| <b><i>Aspergillus penicillioides</i></b>   | 1      | 1         |
| <i>Cladophialophora chaetospora</i>        | 1      | 0         |
| <i>Diplodia mutila</i>                     | 1      | 0         |
| <b><i>Harzia acremonioides</i></b>         | 1      | 1         |
| <b><i>Mucor abundans</i></b>               | 1      | 1         |
| <i>Paraconiothyrium brasiliense</i>        | 1      | 0         |
| <b><i>Paracamarosporium hawaiiense</i></b> | 1      | 1         |
| <b><i>Penicillium brevicompactum</i></b>   | 1      | 1         |
| <i>Rhizopus arrhizus</i>                   | 1      | 0         |
| <i>Sordaria fimicola</i>                   | 0      | 1         |
| <i>Talaromyces minioluteus</i>             | 0      | 1         |
| <b><i>Volutella ciliata</i></b>            | 1      | 1         |
